# Supplementary material for: Acute Pneumonia Caused by Clinically Isolated Legionella pneumophila Sg 1, ST 62: Host Responses and Pathologies in Mice
Source: MDPI journal article supplement (doi:10.3390/microorganisms10010179), 2022-01-14
Supplement: s1 [file s1]

Supplementary materials

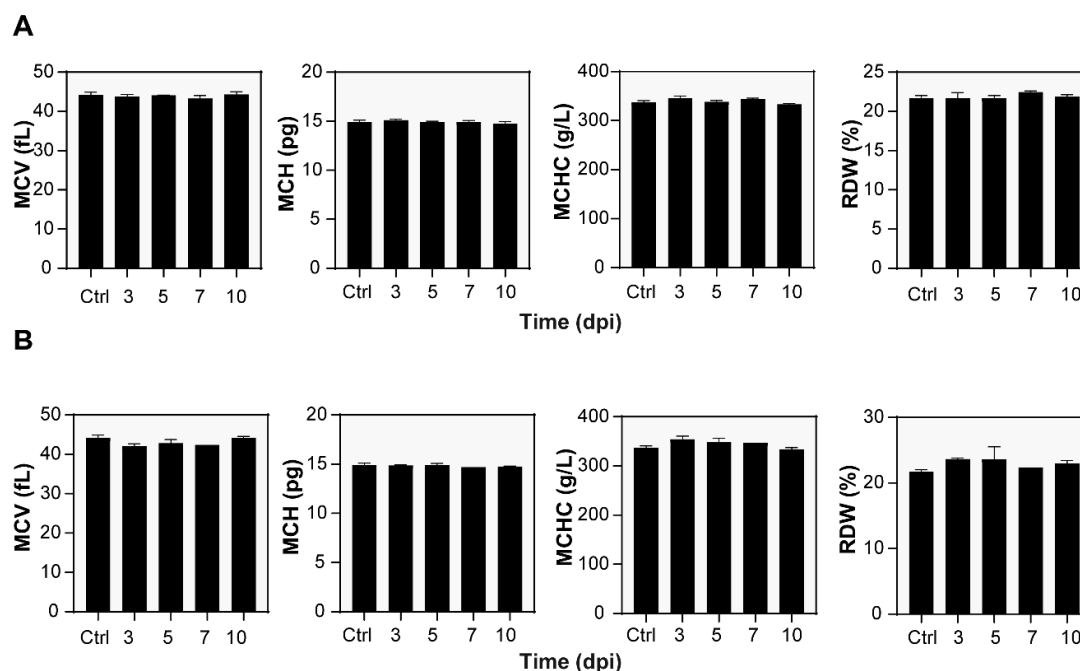

**Figure S1.** Hematological analysis parameters. Mice inoculated either with a low (A) or high (B) dose of *L. pneumophila* Sg 1, ST 62, and MAb Knoxville were anesthetized, and terminal blood collection was carried out via axilla incision. Data represent the mean  $\pm$  SD. MCV—mean corpuscular volume; MCH—mean cell hemoglobin; MCHC—mean corpuscular hemoglobin concentration; RDW—red blood cell distribution width.

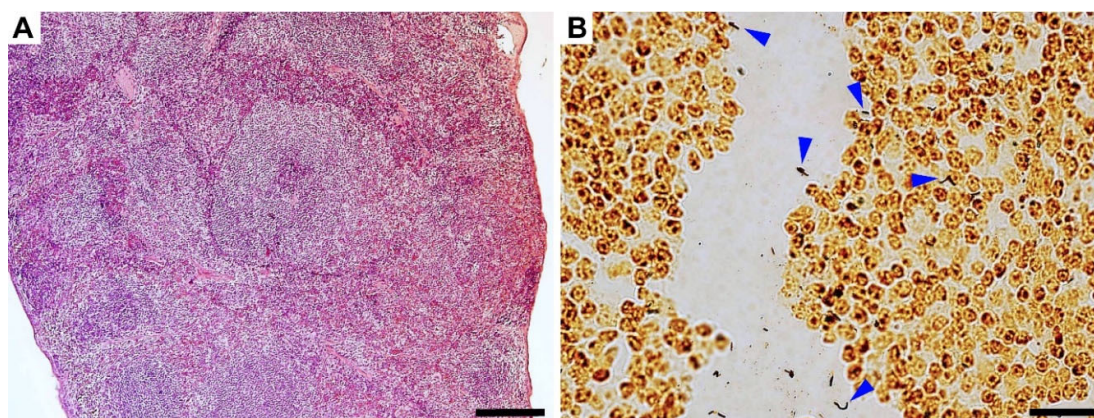

**Figure S2.** Disseminated *L. pneumophila* infection. Spleen histopathology (7 dpi, high-dose challenge) was assessed via (A) H&E staining and (A) Warthin–Starry staining. Rod-shaped structures, presumably *L. pneumophila*, were revealed (blue arrowheads). Scale bars: 200 and 20  $\mu$ m, respectively.
